# Supplementary material for: Beta zeolite supported on silicon carbide for Friedel–Crafts fixed-bed reactionsElectronic supplementary information (ESI) available: Temperature-pressure oxidation spectra and mechanism of phenyl benzoate formation without the participation of phenol. See http://www.rsc.org/suppdata/cc/b2/b209858j/
Source: Royal Society of Chemistry journal article supplement (doi:10.1039/b209858j), 2003-01-16

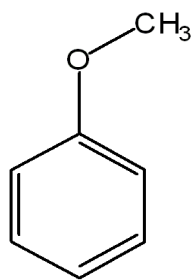

+

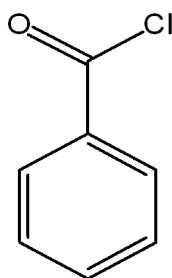

Absorption in the zeolite

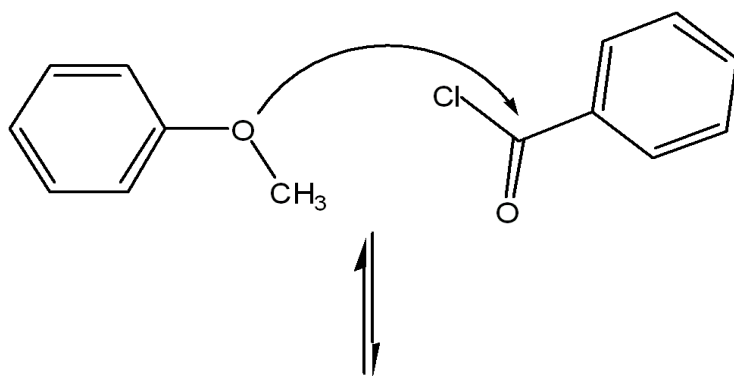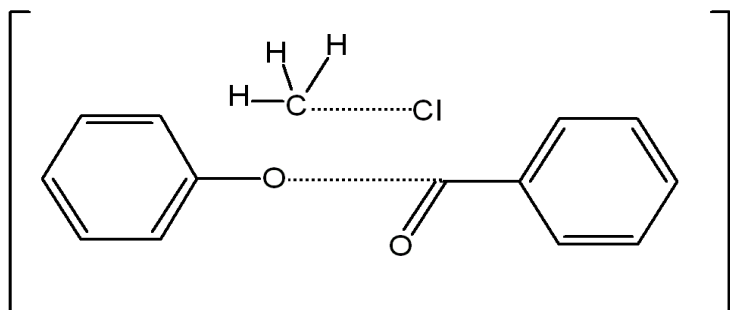

Intermediate inside the zeolite cavity

Desorption from the zeolite

- CH<sub>3</sub>Cl

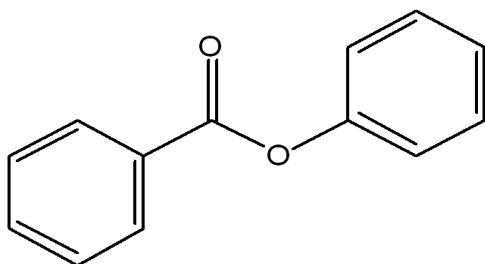

Supplement: b209858j.pdf [file b209858j.pdf]
